# Supplementary material for: Microtube Array Membrane Encapsulated Cell Therapy: A Novel Platform Technology Solution for Treatment of Alzheimer’s Disease
Source: MDPI journal article supplement (doi:10.3390/ijms23126855), 2022-06-20
Supplement: s1 [file s1]

Supplementary data

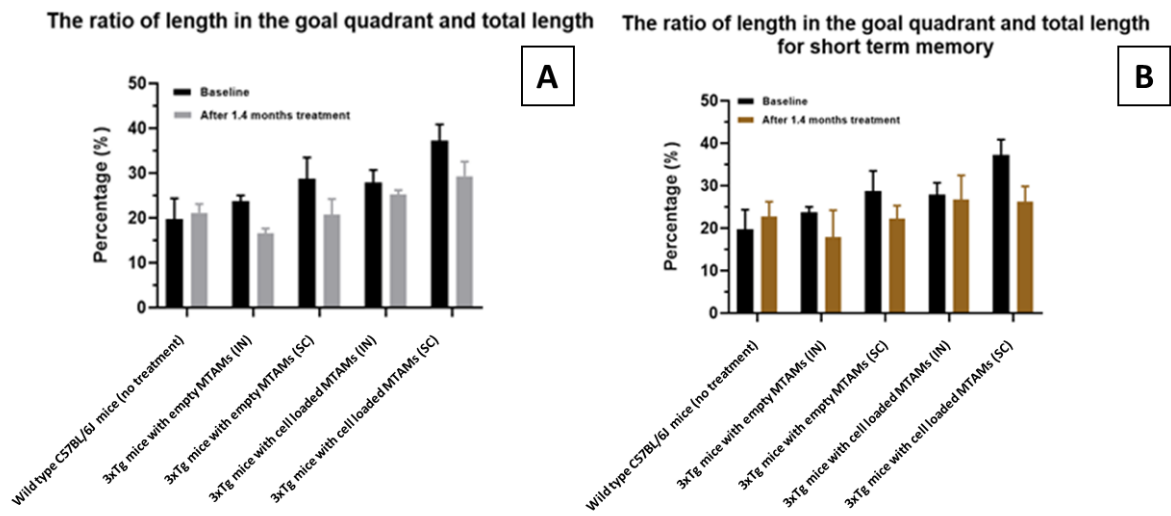

**Figure S1.** (A & B) The percentage of the ratio of length in goal quadrant (duration) and total length (total duration) of long-term memory and short-term memory assessment which revealed identical travel times in goal quadrant between the ratio of the long term memory (E) and those of the short term memory (F), thereby implying a consistent relationship between the two.

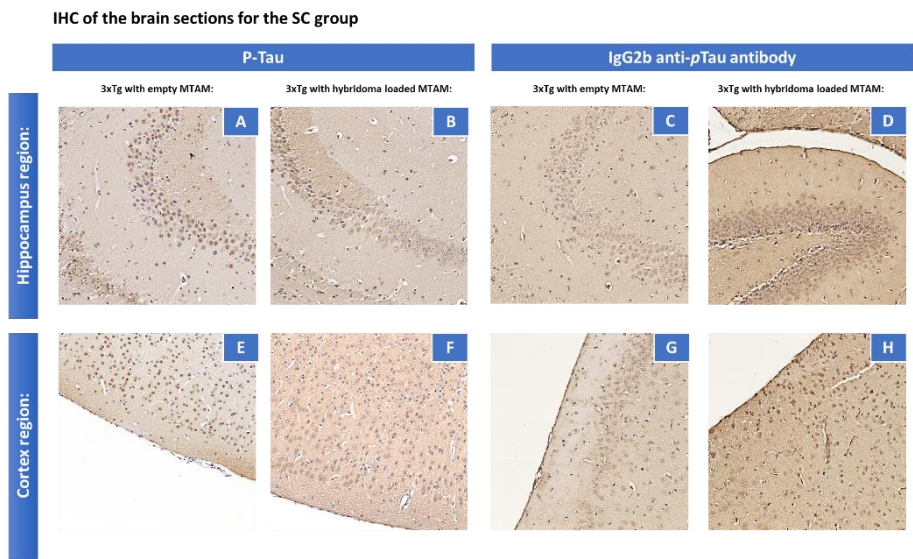

**Figure S2.** (A & C) Brain section of the 3xTg mice with empty MTAM of the Hippocampus region; and (E & F) of the similar study group of the cortex region. (B & D) 3xTg mice with the hybridoma cell loaded implanted of the hippocampus region; and (F & H) of the cortex region.
